# Supplementary material for: Baseline Frontoparietal Task-Related BOLD Activity as a Predictor of Improvement in Clinical Symptoms at 1-Year Follow-Up in Recent-Onset Psychosis
Source: Atypon-hosted journal article supplement (doi:10.1176/appi.ajp.2019.18101126), 2019-07-01
Supplement: appi.ajp.2019.18101126.ds001.pdf [file appi.ajp.2019.18101126.ds001.pdf]

**Figure S1.** Statistical parametric maps of the proactive control (B > A Cue) contrast for each AX protocol version (AX-1 and AX-2) across all participants. Significant activation was observed in the superior parietal cortex (SPC) and dorsolateral prefrontal cortex (DLPFC) in each protocol version (see Supplementary Table 2 for peak p values, peak t values, and cluster sizes at threshold). Maps thresholded at voxelwise  $p < 0.001$ , cluster size  $k > 10$  voxels and masked with an inclusive gray matter mask for visualization.

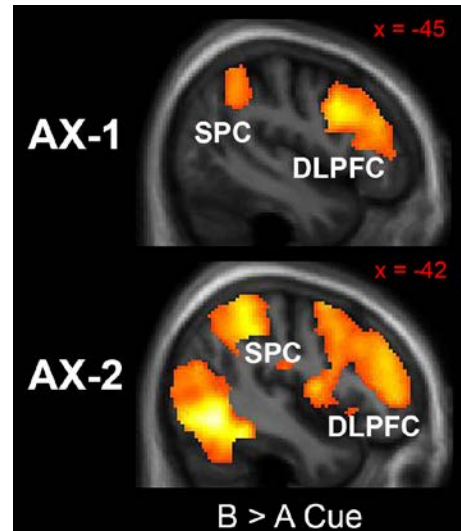

**Table S1A.** Task parameters for AX-CPT Protocols 1 (AX-1) and 2 (AX-2). Abbreviations: ISI = Interstimulus Interval, ITI = Intertrial Interval.

| Protocol | %AX/ay/BX/BY Trials | Total Trials  | Cue Duration (ms) | Probe Duration (ms) | ISI (ms)                | ITI (ms)                 | Total Time |
|----------|---------------------|---------------|-------------------|---------------------|-------------------------|--------------------------|------------|
| AX-1     | 70/10/12.5/7.5      | 4x40<br>= 160 | 500               | 500                 | 3500                    | 9500                     | 37m 20s    |
| AX-2     | 60/10/15/15         | 5x40<br>= 200 | 500               | 500                 | 2200-3500<br>(jittered) | 1700-14500<br>(jittered) | 30m 20s    |

**Table S1B.** Scanning parameters for AX-CPT Protocols 1 (AX-1) and 2 (AX-2).

| Protocol | Scanner                    | TR (ms) | TE (ms) | Flip Angle | FOV (cm) | # Slices | Resolution (mm) | Acquisition             |
|----------|----------------------------|---------|---------|------------|----------|----------|-----------------|-------------------------|
| AX-1     | 1.5T Signa (GE Healthcare) | 2000    | 40      | 90°        | 22x22    | 24       | 3.40x3.40x4.00  | Contiguous, Interleaved |
| AX-2     | 3.0T Tim Trio (Siemens)    | 2000    | 29      | 77°        | 24x24    | 32       | 3.75x3.75x3.5   | Contiguous, Interleaved |

**Table S2.** Comparison of patients with vs. without follow-up clinical data on primary proactive control measures of interest and baseline BPRS score. Proactive control measures were adjusted for protocol version prior to analysis (see Methods). Numbers in parentheses represent the standard deviation.

|                                      | <b>With Follow-Up</b> | <b>Without Follow-Up</b> | <b>t (p)</b> |
|--------------------------------------|-----------------------|--------------------------|--------------|
| <b>D-Prime Context</b>               | -0.24 (1.10)          | -0.24 (1.06)             | 0.04 (0.97)  |
| <b>DLPFC ROI BOLD (B &gt; A Cue)</b> | -0.16 (0.96)          | -0.14 (1.04)             | 0.15 (0.88)  |
| <b>SPC ROI BOLD (B &gt; A Cue)</b>   | -0.13 (0.96)          | -0.24 (1.03)             | 0.72 (0.47)  |
| <b>Baseline BPRS Total</b>           | 42.74 (9.69)          | 41.28 (9.91)             | 0.97 (0.33)  |

**Table S3.** Whole-brain results showing significant (height  $p < 0.001$ , whole-brain cluster  $p_{FDR} < 0.05$ ) activation for the B > A contrast (correct trials only) in expected brain regions for each protocol version (AX-1 and AX-2) across all participants.<sup>a</sup>

| Protocol Version | Brain Region | Hemi | Cluster $p_{FDR}$ | Cluster Size (Voxels) at Voxelwise $p < 0.001$ | Peak x,y,z   | Peak $p$ | Peak t |
|------------------|--------------|------|-------------------|------------------------------------------------|--------------|----------|--------|
| AX-1             | DLPFC        | L    | <0.001            | 1909                                           | -48, 8, 34   | <0.001   | 6.93   |
| AX-1             | SPC          | R    | <0.001            | 2364                                           | 34, -68, 52  | <0.001   | 6.13   |
| AX-1             | DLPFC        | R    | <0.001            | 1085                                           | 54, 12, 36   | <0.001   | 5.84   |
| AX-1             | SPC          | L    | <0.001            | 1716                                           | -28, -72, 46 | <0.001   | 5.36   |
| AX-2             | DLPFC        | R    | <0.001            | 69931 (contiguous cluster) <sup>b</sup>        | 52, 14, 38   | <0.001   | 9.16   |
| AX-2             | SPC          | R    | <0.001            |                                                | 54, -34, 52  | <0.001   | 10.01  |
| AX-2             | DLPFC        | L    | <0.001            |                                                | -50, 8, 26   | <0.001   | 7.51   |
| AX-2             | SPC          | L    | <0.001            |                                                | -52, -38, 50 | <0.001   | 8.05   |

<sup>a</sup> Abbreviations: ACC = Anterior Cingulate Cortex, DLPFC = Dorsolateral Prefrontal Cortex, SPC = Superior Parietal Cortex.

<sup>b</sup> Left/Right SPC and DLPFC break into separate clusters at higher significance thresholds.

**Table S4.** Raw behavioral and functional data segregated by protocol version for the final sample (controls and patients with follow-up clinical data). Numbers in parentheses represent the standard deviation.

| <b>Primary Measures (Used for Logistic Regression)</b>       | <b>AX-1</b>     | <b>AX-2</b>     |
|--------------------------------------------------------------|-----------------|-----------------|
| <b>D-Prime Context</b>                                       | 3.31 (0.83)     | 2.86 (0.79)     |
| <b>DLPFC ROI BOLD (B &gt; A Cue)</b>                         | 0.24 (0.96)     | 0.55 (0.93)     |
| <b>SPC ROI BOLD (B &gt; A Cue)</b>                           | 0.54 (1.01)     | 0.95 (1.37)     |
| <b>Auxiliary Measures (Not Used for Logistic Regression)</b> |                 |                 |
| <b>Accuracy (%)</b>                                          |                 |                 |
| AX Trials                                                    | 96.08 (6.02)    | 92.10 (7.03)    |
| AY Trials                                                    | 82.31 (19.20)   | 79.18 (16.55)   |
| BX Trials                                                    | 89.61 (12.45)   | 88.66 (11.08)   |
| BY Trials                                                    | 97.71 (5.54)    | 96.08 (6.98)    |
| <b>Reaction Time</b>                                         |                 |                 |
| AX Trials                                                    | 576.38 (140.39) | 460.61 (77.12)  |
| AY Trials                                                    | 747.37 (150.69) | 577.64 (90.11)  |
| BX Trials                                                    | 678.35 (235.04) | 471.05 (125.46) |
| BY Trials                                                    | 607.76 (173.64) | 470.77 (103.82) |
